# Supplementary material for: Fatty-acid binding protein 5 modulates the SAR1 GTPase cycle and enhances budding of large COPII cargoes
Source: PubMed Central journal article supplement — Mol Biol Cell. 2019 Feb 1;30(3):387–99. doi: 10.1091/mbc.E18-09-0548 (PMC6589570; doi:10.1091/mbc.e18-09-0548), 2019-02-01
Supplement: mbc-30-387-s001.pdf [file mbc-30-387-s001.pdf]

# Supplemental Materials

*Molecular Biology of the Cell*

Melville et al.

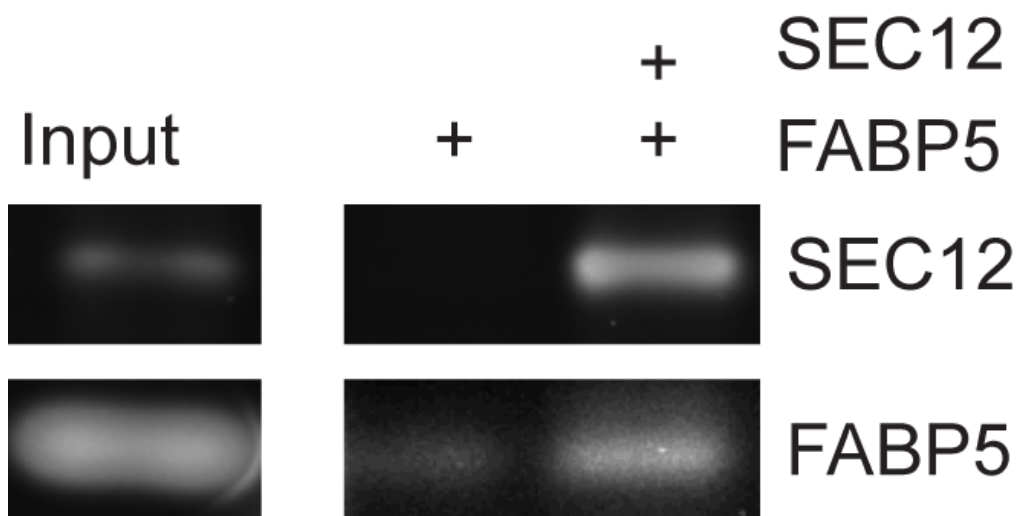

**Supplemental Figure 1.** Sypro Ruby stain of FABP5 and COPII components recruited to floated synthetic liposomes
